# Supplementary material for: Long-term dietary flavonoid intake and risk of Alzheimer disease and related dementias in the Framingham Offspring Cohort
Source: PubMed Central journal article supplement — Am J Clin Nutr. 2020 Apr 22;112(2):343–53. doi: 10.1093/ajcn/nqaa079 (PMC7398772; doi:10.1093/ajcn/nqaa079), 2020-04-22
Supplement: nqaa079_supplement_file.pdf [file nqaa079_supplement_file.pdf]

# Long-term dietary flavonoid intake and risk of Alzheimer's disease and related dementias in the Framingham Offspring Cohort

Esra Shishtar

## Online Supplementary Material

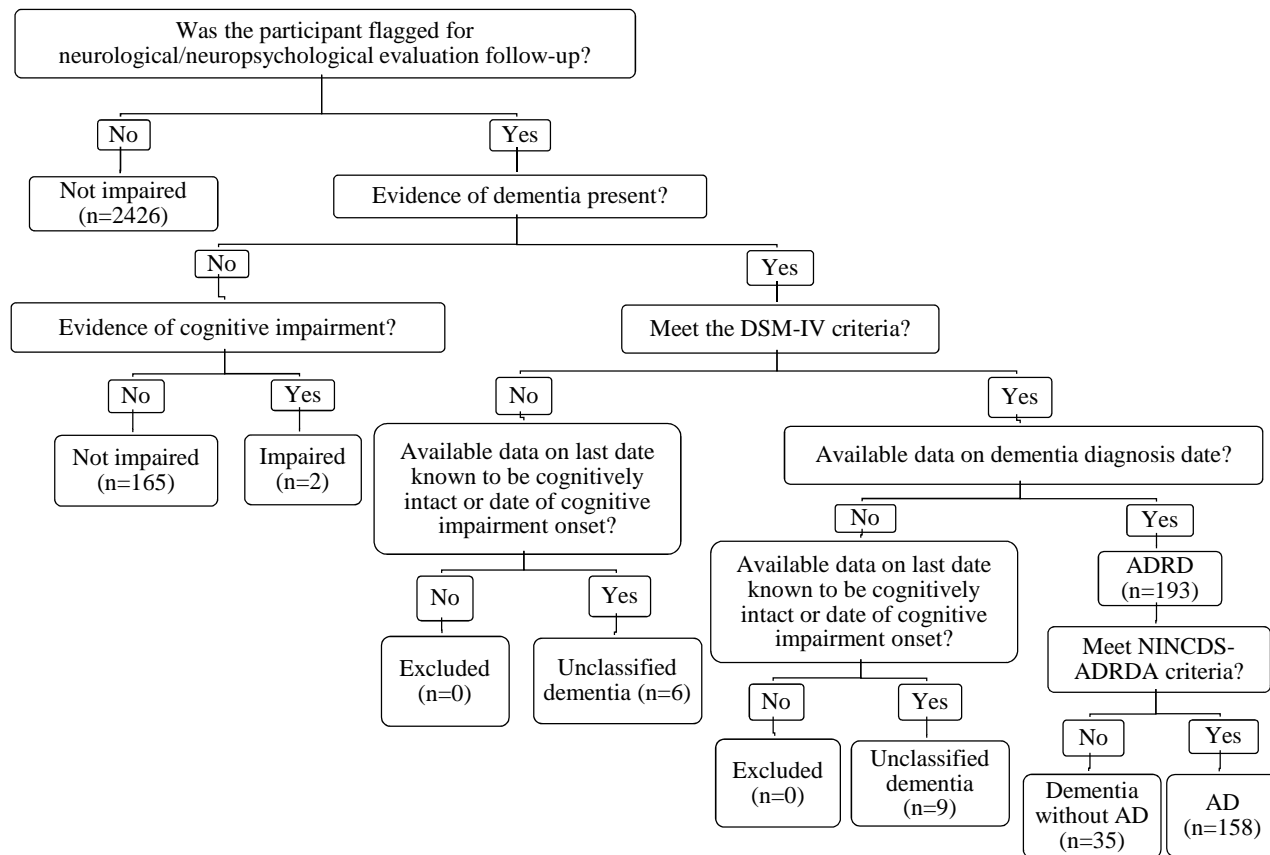

Supplemental Figure 1. Criteria for Alzheimer's disease and related dementias and Alzheimer's disease classification. AD, Alzheimer's disease; ADRD, Alzheimer's disease and related dementias; DSM-IV, Diagnostic and Statistical Manual of Mental Disorders, fourth edition; NINCDS-ADRDA, National Institute of Neurological and Communicative Diseases and Stroke and the Alzheimer's Disease and Related Disorders Association.

**Supplemental Table 1. Top contributing foods for total flavonoids and each flavonoid class among our population at exam 5**

| <b>Flavonoid class</b> | <b>Top contributing foods<sup>1</sup> (%)</b>                                            |
|------------------------|------------------------------------------------------------------------------------------|
| Flavonols              | Tea (17.5)<br>Apples/pears (13.1)                                                        |
| Flavones               | Orange juice (39.0)<br>Oranges (12.5)                                                    |
| Flavanones             | Orange juice (50.1)<br>Oranges (22.4)                                                    |
| Flavan-3-ols           | Tea (30.7)<br>Apples/pears (12.6)<br>Bananas (10.3)                                      |
| Anthocyanins           | Blueberry muffins (25.4)<br>Blueberries (25.1)<br>Strawberries (14.8)<br>Red wine (10.8) |
| Flavonoid polymers     | Tea (25.8)<br>Apples/pears (25.1)                                                        |
| Total flavonoids       | Tea (22.0)<br>Apples/pears (16.1)<br>Orange juice (12.3)                                 |

<sup>1</sup>Contributing to  $\geq 10\%$  to total intake for total flavonoids and each flavonoid class

**Supplemental Table 2. Hazard ratios (95% confidence interval) of Alzheimer's disease and related dementias (ADRD) events over 26 years of follow-up<sup>1</sup> based on a 10-year cutoff between ADRD diagnosis and updated flavonoid intake data**

| Flavonoid class           | Flavonoid intake percentile category          |                                                    |                                                    |                                  | <i>P</i> -trend <sup>2</sup> |
|---------------------------|-----------------------------------------------|----------------------------------------------------|----------------------------------------------------|----------------------------------|------------------------------|
|                           | ≤15 <sup>th</sup><br>(n <sup>3</sup> =411/28) | >15 <sup>th</sup> – 30 <sup>th</sup><br>(n=412/30) | >30 <sup>th</sup> – 60 <sup>th</sup><br>(n=824/37) | >60 <sup>th</sup><br>(n=1099/43) |                              |
| <b>Flavonols</b>          | (n <sup>3</sup> =411/28)                      | (n=412/30)                                         | (n=824/37)                                         | (n=1099/43)                      |                              |
| Model 1 <sup>4</sup>      | 1.00 (ref.)                                   | 1.05 (0.62,1.78)                                   | 0.64 (0.38,1.07)                                   | 0.53 (0.31,0.90)                 | 0.005                        |
| Model 2 <sup>5</sup>      | 1.00 (ref.)                                   | 1.01 (0.59,1.72)                                   | 0.59 (0.35,0.99)                                   | 0.50 (0.29,0.85)                 | 0.003                        |
| Model 3 <sup>6</sup>      | 1.00 (ref.)                                   | 0.96 (0.53,1.71)                                   | 0.61 (0.35,1.09)                                   | 0.50 (0.27,0.92)                 | 0.02                         |
| <b>Flavones</b>           | (n=410/29)                                    | (n=414/13)                                         | (n=823/33)                                         | (n=1099/63)                      |                              |
| Model 1 <sup>4</sup>      | 1.00 (ref.)                                   | 0.44 (0.23,0.85)                                   | 0.43 (0.26,0.71)                                   | 0.60 (0.37,0.97)                 | 0.42                         |
| Model 2 <sup>5</sup>      | 1.00 (ref.)                                   | 0.44 (0.23,0.86)                                   | 0.42 (0.25,0.71)                                   | 0.59 (0.36,0.96)                 | 0.39                         |
| Model 3 <sup>6</sup>      | 1.00 (ref.)                                   | 0.47 (0.24,0.95)                                   | 0.47 (0.27,0.81)                                   | 0.67 (0.39,1.15)                 | 0.75                         |
| <b>Flavanones</b>         | (n=412/27)                                    | (n=412/8)                                          | (n=824/28)                                         | (n=1098/75)                      |                              |
| Model 1 <sup>4</sup>      | 1.00 (ref.)                                   | 0.21 (0.10,0.48)                                   | 0.33 (0.19,0.57)                                   | 0.56 (0.35,0.90)                 | 0.70                         |
| Model 2 <sup>5</sup>      | 1.00 (ref.)                                   | 0.22 (0.10,0.49)                                   | 0.34 (0.20,0.60)                                   | 0.54 (0.34,0.88)                 | 0.92                         |
| Model 3 <sup>6</sup>      | 1.00 (ref.)                                   | 0.26 (0.12,0.60)                                   | 0.40 (0.23,0.72)                                   | 0.62 (0.37,1.05)                 | 0.61                         |
| <b>Flavan-3-ols</b>       | (n=412/28)                                    | (n=412/25)                                         | (n=824/29)                                         | (n=1098/56)                      |                              |
| Model 1 <sup>4</sup>      | 1.00 (ref.)                                   | 0.92 (0.53,1.59)                                   | 0.52 (0.30,0.88)                                   | 0.66 (0.40,1.08)                 | 0.26                         |
| Model 2 <sup>5</sup>      | 1.00 (ref.)                                   | 0.86 (0.50,1.51)                                   | 0.48 (0.27,0.82)                                   | 0.61 (0.37,1.00)                 | 0.20                         |
| Model 3 <sup>6</sup>      | 1.00 (ref.)                                   | 0.73 (0.41,1.32)                                   | 0.44 (0.25,0.79)                                   | 0.58 (0.34,0.99)                 | 0.33                         |
| <b>Anthocyanins</b>       | (n=412/39)                                    | (n=412/25)                                         | (n=824/41)                                         | (n=1098/33)                      |                              |
| Model 1 <sup>4</sup>      | 1.00 (ref.)                                   | 0.50 (0.30,0.83)                                   | 0.40 (0.25,0.63)                                   | 0.24 (0.15,0.40)                 | <0.001                       |
| Model 2 <sup>5</sup>      | 1.00 (ref.)                                   | 0.46 (0.27,0.76)                                   | 0.39 (0.24,0.61)                                   | 0.22 (0.13,0.38)                 | <0.001                       |
| Model 3 <sup>6</sup>      | 1.00 (ref.)                                   | 0.42 (0.24,0.72)                                   | 0.36 (0.22,0.59)                                   | 0.22 (0.12,0.39)                 | <0.001                       |
| <b>Flavonoid polymers</b> | (n=412/23)                                    | (n=412/31)                                         | (n=824/31)                                         | (n=1098/53)                      |                              |
| Model 1 <sup>4</sup>      | 1.00 (ref.)                                   | 1.15 (0.67,2.00)                                   | 0.53 (0.30,0.93)                                   | 0.64 (0.37,1.09)                 | 0.09                         |
| Model 2 <sup>5</sup>      | 1.00 (ref.)                                   | 1.10 (0.63,1.91)                                   | 0.50 (0.28,0.88)                                   | 0.58 (0.34,1.01)                 | 0.06                         |
| Model 3 <sup>6</sup>      | 1.00 (ref.)                                   | 1.05 (0.58,1.89)                                   | 0.53 (0.29,0.96)                                   | 0.61 (0.34,1.10)                 | 0.13                         |

| Flavonoid class         | Flavonoid intake percentile category |                                      |                                      |                   | <i>P</i> -trend <sup>2</sup> |
|-------------------------|--------------------------------------|--------------------------------------|--------------------------------------|-------------------|------------------------------|
|                         | ≤15 <sup>th</sup>                    | >15 <sup>th</sup> – 30 <sup>th</sup> | >30 <sup>th</sup> – 60 <sup>th</sup> | >60 <sup>th</sup> |                              |
| <b>Total flavonoids</b> | (n=412/22)                           | (n=412/29)                           | (n=823/36)                           | (n=1099/51)       |                              |
| Model 1 <sup>4</sup>    | 1.00 (ref.)                          | 1.14 (0.65,2.02)                     | 0.66 (0.38,1.14)                     | 0.61 (0.35,1.07)  | 0.04                         |
| Model 2 <sup>5</sup>    | 1.00 (ref.)                          | 1.11 (0.63,1.97)                     | 0.61 (0.35,1.07)                     | 0.56 (0.32,0.99)  | 0.02                         |
| Model 3 <sup>6</sup>    | 1.00 (ref.)                          | 1.04 (0.57,1.92)                     | 0.64 (0.35,1.16)                     | 0.58 (0.32,1.08)  | 0.05                         |

<sup>1</sup>Mean follow-up time of 19.9 years.

<sup>2</sup>*P* values for the test of linear trend across percentile categories were based on linear regression models with the median intake of each percentile category assigned to individuals with intake in that category, and this percentile median variable was used as a continuous measure in regression models.

<sup>3</sup>*n* represents the number of participants/ADRD events per percentile category for model 1.

<sup>4</sup>Model 1 adjusted for age, sex, education, Apolipoprotein E ε4 allele, and total calorie intake; total N 2746; *n* ADRD events 138.

<sup>5</sup>Model 2 adjusted for model 1 covariates + physical activity index, smoking status, body mass index, prevalent stroke, diabetes, hypertension, and hypercholesterolemia; total N 2746; *n* ADRD events 138.

<sup>6</sup>Model 3 adjusted for model 1 and model 2 covariates + overall dietary quality, vitamin and mineral supplement use, and dietary intakes of alcohol, omega-3 fatty acids (eicosapentaenoic and docosahexaenoic acid) and lutein and zeaxanthin; total N 2739; *n* ADRD events 131.
